# Supplementary material for: Leukemic progenitor cells enable immunosuppression and post-chemotherapy relapse via IL-36–inflammatory monocyte axis
Source: PubMed Central journal article supplement — Sci Adv. 2021 Oct 8;7(41):eabg4167. doi: 10.1126/sciadv.abg4167 (PMC8500518; doi:10.1126/sciadv.abg4167), 2021-10-08
Supplement: sciadv.abg4167_sm.pdf [file sciadv.abg4167_sm.pdf]

## Supplementary Materials for

### **Leukemic progenitor cells enable immunosuppression and post-chemotherapy relapse via IL-36–inflammatory monocyte axis**

He-Zhou Guo, Zi-Hua Guo, Shan-He Yu, Li-Ting Niu, Wan-Ting Qiang, Meng-Meng Huang,  
Yuan-Yuan Tian, Juan Chen, Hui Yang, Xiang-Qin Weng, Yi Zhang, Wu Zhang,  
Shao-Yan Hu, Jun Shi\*, Jiang Zhu\*

\*Corresponding author. Email: [zhujiang@shsmu.edu.cn](mailto:zhujiang@shsmu.edu.cn) (J.Z.); [junshi@sjtu.edu.cn](mailto:junshi@sjtu.edu.cn) (J.S.)

Published 8 October 2021, *Sci. Adv.* **7**, eabg4167 (2021)  
DOI: [10.1126/sciadv.abg4167](https://doi.org/10.1126/sciadv.abg4167)

#### **This PDF file includes:**

Supplementary Materials and Methods  
Figs. S1 to S7  
Table S1  
References

## **Supplementary Materials and Methods**

### **Reagents**

Cytarabine (Selleck Chemicals; S1648). Doxorubicin (Selleck Chemicals; S1208). Nor-NOHA (ApexBio Technology; C5407). SC75741 (MedChem Express; HY-10496). U0126 (MedChem Express; HY-12031A). Stattic (MedChem Express; HY-13818). L-NMMA (MedChem Express; HY-18732A). Trabectedin (MedChem Express; HY-50936). VX-765 (MedChem Express; HY-13205). Clodronate liposomes and Control liposomes (LIPOSOMA; CP-005-005). Recombinant human IL-36 $\gamma$  (R&D Systems; 6835-IL-010). Recombinant mouse IL-36 $\gamma$  (R&D Systems; 6996-IL-010). Recombinant human IL-36Ra (R&D Systems; 1275-IL-025). Recombinant mouse IL-36Ra (R&D Systems; 2714-ML-025). Recombinant human IL-36 $\alpha$  (R&D Systems; 6995-IL-010). Doxycycline (Clontech; 631311). Anti-mouse IL-1 $\beta$  antibody (R&D Systems; AF-401-NA). Anti-mouse NK1.1 antibody (Bio X cell; BE0036). Anti-mouse CD8 $\beta$  antibody (Bio X cell; BE0223). Anti-mouse PD-1 antibody (Bio X cell; BP0146). Isotype control antibody (Bio X cell; BE0085, BE0088, BE0075, BP0089).

### **Conditional medium**

To make conditional medium (CM), mouse leukemia cells ( $5 \times 10^6$  cells/ml) cultured with IMDM containing 10% FBS, 50 ng/ml mSCF, 10 ng/ml mIL-6, 6 ng/ml mIL-3 for 30 hours. Then, the supernatant was collected as CM. Human leukemia cells ( $5 \times 10^6$  cells/ml) were cultured with IMDM supplemented with 20% BIT for 30 hours. Then, the supernatant was collected as CM. In some experiments, Ara-C (80 nM) and VX-765 (100  $\mu$ M) were added.

### **Cytokines array**

The Bio-Plex Magpix System (BIO-RAD) was used to measure the levels of relevant cytokines in mouse bone marrow supernatant. Bio-Plex Pro Mouse Cytokine 23-Plex Panel (BIO-RAD;

M60009RDPD), Bio-Plex Pro Mouse Cytokine 9-Plex Panel (BIO-RAD; MD000000EL) and Bio-Plex Pro Mouse Cytokine Th17 Panel A 6-Plex Panel (BIO-RAD; M6000007NY) were used.

### **Il-36R knockdown hematopoietic chimeric mice**

Il-36R shRNAs were cloned into lentiviral plasmid that express mCherry to produce lentivirus. Lineage<sup>-</sup> bone marrow cells derived from FVB/NJ mice were infected with this lentivirus. The transduced mCherry<sup>+</sup> cells were sorted out and transplanted into lethally irradiated (9 Gy) FVB/NJ mice to make chimeric mice. The shRNA target sequences are as follow: 5'-CCAGATGTGTACCAGCAAATA-3'.

### **Quantification of cytokines**

Cytokine concentrations were measured using specific ELISA kits, including those for mouse Il-36 $\gamma$  (Cloud-Clone Corp; SEL621Mu), mouse Il-1 $\beta$  (R&D Systems; MLB00C), human IL-36 $\alpha$  (R&D Systems; DY1078-05), human IL-1 $\beta$  (R&D Systems; DLB50) according to the manufacturers' instructions.

### **Quantitative real-time RT-PCR:**

Total cellular RNA was extracted using the EZ-press RNA purification kit (EZBioscience; B0004plus) following the manufacturer's protocol. The cDNA was synthesized through reverse transcription of 1  $\mu$ g of RNA using ReverTra Ace- $\alpha$ TM (TOYOBO; FSQ-101). Quantitative real-time RT-PCR reactions were performed using TB Green Premix Ex Taq (Takara; RR420A) on an ABI 7300 Real-Time PCR system. The primer sequences for the detection of target genes are acquired from online resource: <https://pga.mgh.harvard.edu/primerbank/>. Mouse *Il-36 $\gamma$*  primers: forward-5'-TCCTGACTTTGGGGAGGTTTT-3'; reverse-5'-TCACGCTGACTGGGGTTACT-3'. Mouse *Cxcl10* primers: forward-5'-

CCAAGTGCTGCCGTCATTTTC-3'; reverse-5'-GGCTCGCAGGGATGATTTCAA-3'. Mouse *Mst1* primers: forward-5'-CTCACCCTGAATGACTTCCAG-3'; reverse-5'-AAGGCCCGACAGTCCAGAA-3'. Mouse *Nos2* primers: forward-5'-GTTCTCAGCCCAACAATACAAGA-3'; reverse-5'-GTGGACGGGTCGATGTCAC-3'. Mouse *Arg1* primers: forward-5'-CTCCAAGCCAAAGTCCTTAGAG-3'; reverse-5'-AGGAGCTGTCATTAGGGACATC-3'. Mouse *Il-36R* primers: forward-5'-GCAGCAGATACGTGTGAGGAC-3'; reverse-5'-GTACCATGTCAGATTTACTGCCC-3'. Mouse *Caspase-1* primers: forward-5'-ACAAGGCACGGGACCTATG-3'; reverse-5'-TCCCAGTCAGTCCTGGAAATG-3'. Mouse *Gapdh* primers: forward-5'-AGGTCGGTGTGAACGGATTTG-3'; reverse-5'-TGTAGACCATGTAGTTGAGGTCA-3'. Human *IL-36α* primers: forward-5'-CCAGACGCTCATAGCAGTCC-3'; reverse-5'-AGATGGGGTTCCTCTGTCTT-3'. Human *GAPDH* primers: forward-5'-GGAGCGAGATCCCTCCAAAAT-3'; reverse-5'-GGCTGTTGTCATACTTCTCATGG-3'.

### **Western blotting**

Total cell lysates were equally loaded on 8-12% SDS-polyacrylamide gel for running and then transferred to PVDF membranes (GE Healthcare Life Science; 10600023). After blocking with 5% nonfat milk in TBST, the membranes were incubated for 2 hours or overnight with the primary antibodies. After staining with horseradish peroxidase (HRP)-linked secondary antibodies, signal detection was performed using a chemiluminescence phototope-HRP Kit (Millipore; WBKLS0500). p65 (8242S), p-p65 (3033S), actin (3700S), anti-mouse IgG, HRP-linked antibody (7076S) and anti-rabbit IgG, HRP-linked antibody (7074S) were purchased from Cell Signaling Technology. Caspase-1 antibody (Santa Cruz Biotechnology; sc-56036). IL-36α antibody (R&D Systems; MAB1078).

## **Chromatin immunoprecipitation (ChIP)**

ChIP assays were performed essentially as previously described (45). Briefly, cells were harvested and crosslinked with 1% formaldehyde for 10 minutes at room temperature. After sonication, the soluble chromatin was incubated with the following antibodies separately: anti-H3K27me3 (Abcam; ab6002); anti-H3K4me3 (Abcam; ab8580), anti-NF- $\kappa$ B p65 (Santa Cruz; sc-8008) or anti-control IgG (Abcam; ab172730). Chromatin immunocomplexes were then precipitated with Protein A (Millipore; 16-661) or Protein G (Millipore; 16-662). The immunoprecipitated complex was washed, and DNA was extracted and purified by QIAquick PCR Purification Kit (Qiagen; 28104). ChIP DNA was analyzed by qPCR using specific primers, and the data were normalized by input DNA. The primers used for ChIP-qPCR were as follows:

mouse *Il-36 $\gamma$*  for H3K27me3 or H3K4me3 binding: forward-5'-

TTAGCCCTGACCCTAATCGC-3', reverse-5'-GGGAGAGAGCAGGGTAAGTG-3'; mouse

*Il-36 $\gamma$*  for p65 binding: forward-5'-CGGAAATTTGGGGGTCTAAC-3', reverse-5'-

CAGCCCCATAGGTCAGTCAC-3'. Human *IL-36 $\alpha$*  for p65 binding: forward-5'-

TCATTGACCCGGAAGAAGTC -3', reverse-5'- TGAAACATGAGGGCATGCTA-3'.

## **Bioinformatics analyses**

HemaExplorer database was used to retrieve mRNA expression data for the expression patterns of *IL-36 $\alpha$*  in AML patients and normal hematopoietic cells

(<http://servers.binf.ku.dk/hemaexplorer>) (46, 47). p65 ChIP-seq data for mouse macrophages

were obtained from ref. (48) (GEO accession: GSE46494). p65 ChIP-seq data for human aortic

endothelial cells were obtained from ref. (49) (GEO accession: GSE89970). ChIP-seq data were

processed by Cistrome analysis pipeline and was loaded to UCSC genome browsers for

visualization (50). The microarray expression data in the BM mononuclear cells of 494 AML

patients were obtained from the GEO GSE131559 dataset (35, 36), the RSEM expression estimates normalized to set the upper quartile count at 1,000 for gene level and then with log<sub>2</sub> transformation. The AML samples were clustered using the MDSC genes into MDSC-high, MDSC-low, and MDSC-medium (distance between pairs of samples was measured by Manhattan distance, and clustering was then performed using complete-linkage hierarchical clustering). Wilcoxon test was used to compare the expression of *IL-36a* in different groups.

### **Flow cytometry analysis and sorting**

For assessing cell cycle, Ki-67 staining (BD Biosciences; 561126) were measured. For assessing cell survival, Annexin V-APC/BV421 staining (BD Biosciences; 550474/563973) were measured. For assessing active caspase-1, FLICA 660 Caspase-1 Assay (ImmunoChemistry Technologies; 9122) were conducted according to the manufacturers' instructions. Anti-mouse flow cytometry antibody were purchased from BD Biosciences: CD45.1-BV605/APC (747743/561873), CD45.2-APC (558702), CD8 $\alpha$ -PE-Cy7/PerCP (552877/553036), IFN- $\gamma$ -BV786 (563773), CD3e-PE/biotin/APC-Cy7/BV421 (553063/553060/557596/562600), PD-L1-BV421 (564716), c-Kit-APC/PE-Cy7 (553356/558163), Gr-1-APC/biotin/PE/BV421/PerCP-Cy5.5/FITC (553129/51-01212J/553128/562709/552093/553126), CD115-PE/APC (565249/567027), B220-biotin (553085), Ter119-biotin/BV421 (553672/563998), CD11b-biotin (51-01712J), F4/80-APC/PE (566787/565410), CD4-BV421 (562891), FOXP3-PE (560408), NK1.1-PE (553165), CD335-PE (560757). Anti-human flow cytometry antibody were purchased from BD Biosciences: CD3-APC (555342), CD8-BV786 (563823), CD34-FITC (555821), CD45-FITC (555482), CD24-PE (555428), CD56-PE-Cy7 (557747), CD14-BV421 (563743), CD16-APC (561304), CD33-APC (551378). Streptavidin BV421/PCP5.5/FITC (563259/551419/554060). APC-conjugated  $\alpha$ -OVA<sub>257-264</sub> (SIINF EK L) peptide bound to H-2K<sup>b</sup>

(17-5743-80) was purchased from eBioscience. APC-conjugated H-2K<sup>b</sup> OVA Tetramer-SIINFEKL (TS-M008-2) was purchased from MBL. APC-conjugated anti-mouse H-2K<sup>b</sup> (116518) was purchased from BioLegend. The flow cytometric data were collected with a BD Calibur or LSRII (Becton Dickinson) and analyzed using FlowJo software. In the sorting experiment, the stained cells were sorted out with a cell sorter (BD FACSAria™).

**Fig. S1.**

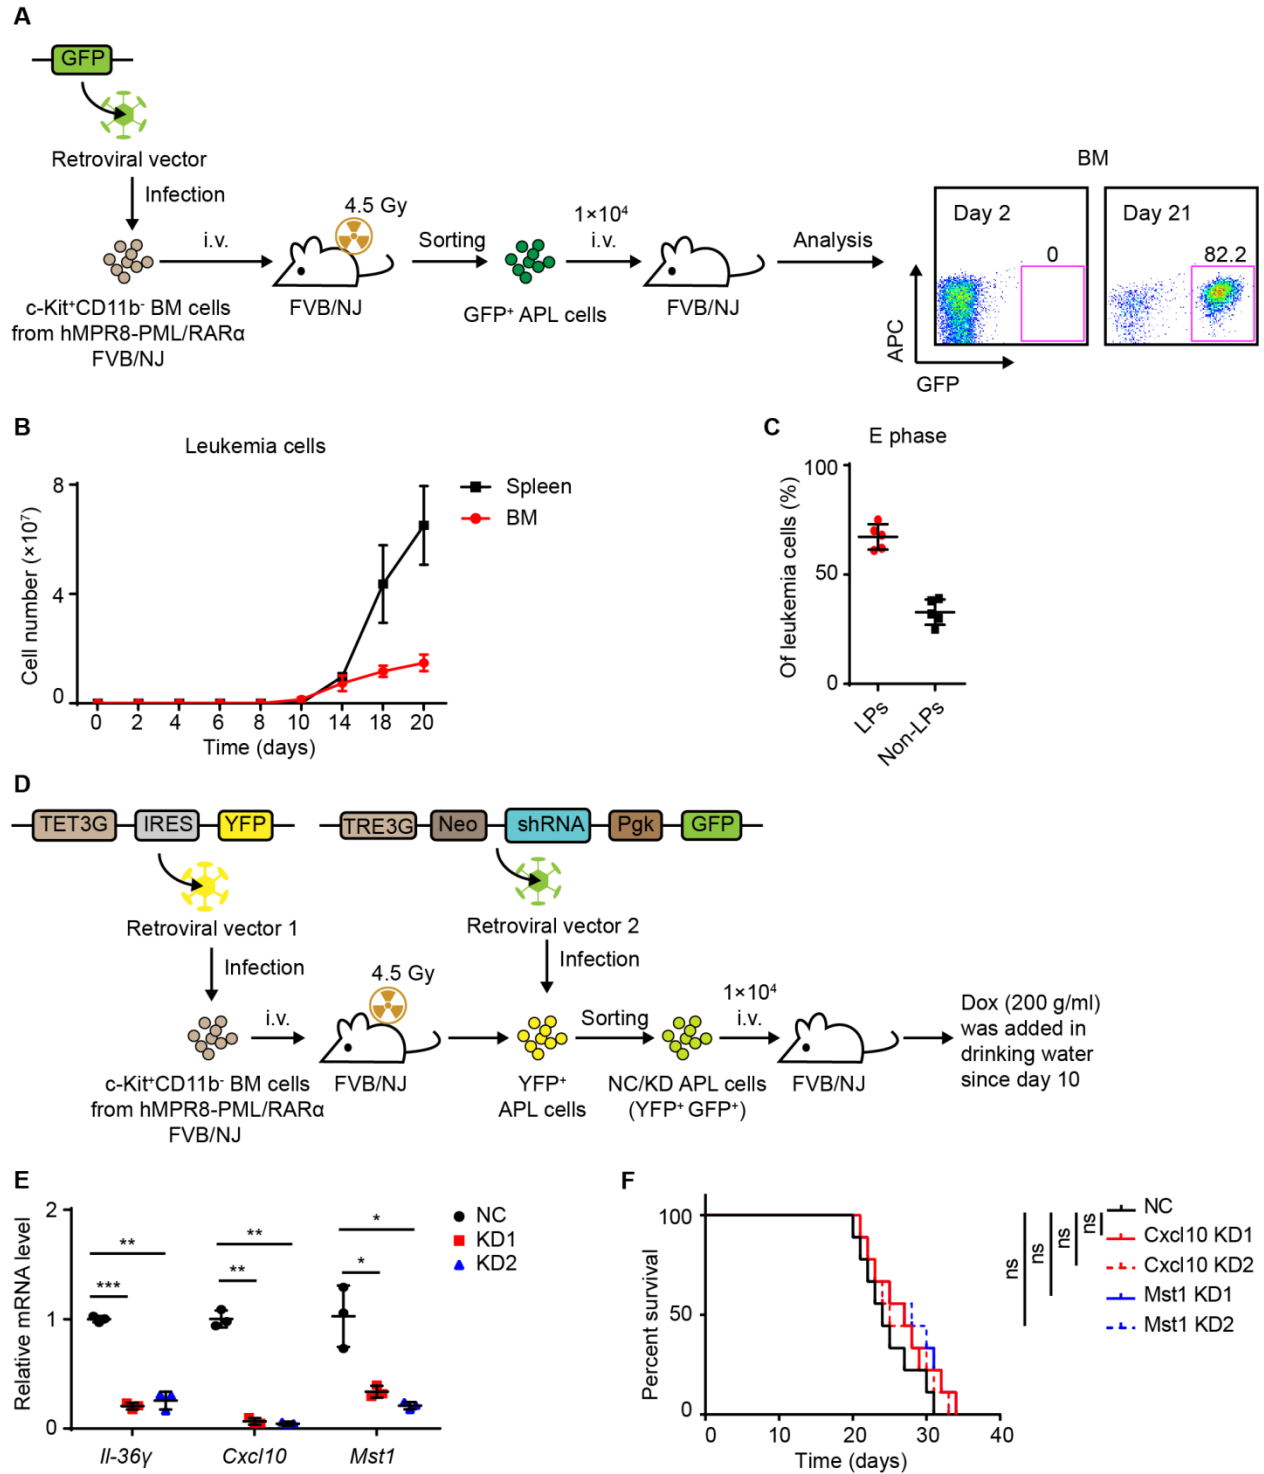



**Fig. S1. Leukemic Il-36 $\gamma$  but not Cxcl10 or Mst1 promotes leukemic progression.**

**(A-C)** The c-Kit<sup>+</sup>CD11b<sup>-</sup> BM cells from *hMRP8-PML-RAR $\alpha$*  transgenic FVB/NJ mice were infected with retroviral MigR1 vector expressing GFP and transplanted into sub-lethally irradiated (4.5 Gy) FVB/NJ mice. Then,  $1 \times 10^4$  GFP<sup>+</sup> APL cells sorted from these mice were transplanted into non-irradiated FVB/NJ mice to establish APL model **(A)**. **(B)** The numbers of APL cells in BM and spleen are shown (n=5 mice per time points). **(C)** The percentages of LPs (c-Kit<sup>+</sup>) and non-LPs (c-Kit<sup>-</sup>) in BM APL cells during the E phase are shown (n=5 mice).

**(D-F)** Flow chart **(D)** of the genetic incorporation of Dox-inducible expression system into APL cells. Retroviral vector 1 contained the expression cassette of TET3G and YFP. Retroviral vector 2 contained an expression cassette of the negative control (NC) or knockdown (KD) shRNA under the direction of Dox responsive TRE3G, and a separate GFP expression cassette under the direction of P<sub>gk</sub> promoter. After infection,  $1 \times 10^4$  YFP<sup>+</sup>GFP<sup>+</sup> NC or KD APL cells were sorted and transplanted into non-irradiated FVB/NJ mice to establish the APL mice model. Dox was supplied since day 10. **(E)** qRT-PCR analysis for the mRNA level of knockdown genes in BM APL cells treated with Dox for 6 days *in vivo* (n=3). **(F)** Survival curve of the APL recipients were generated (n=9 mice per group).

Data are presented as mean  $\pm$  SD. \* $p < 0.05$ , \*\* $p < 0.01$ , \*\*\* $p < 0.001$ . ns: not significant.

**Fig. S2.**

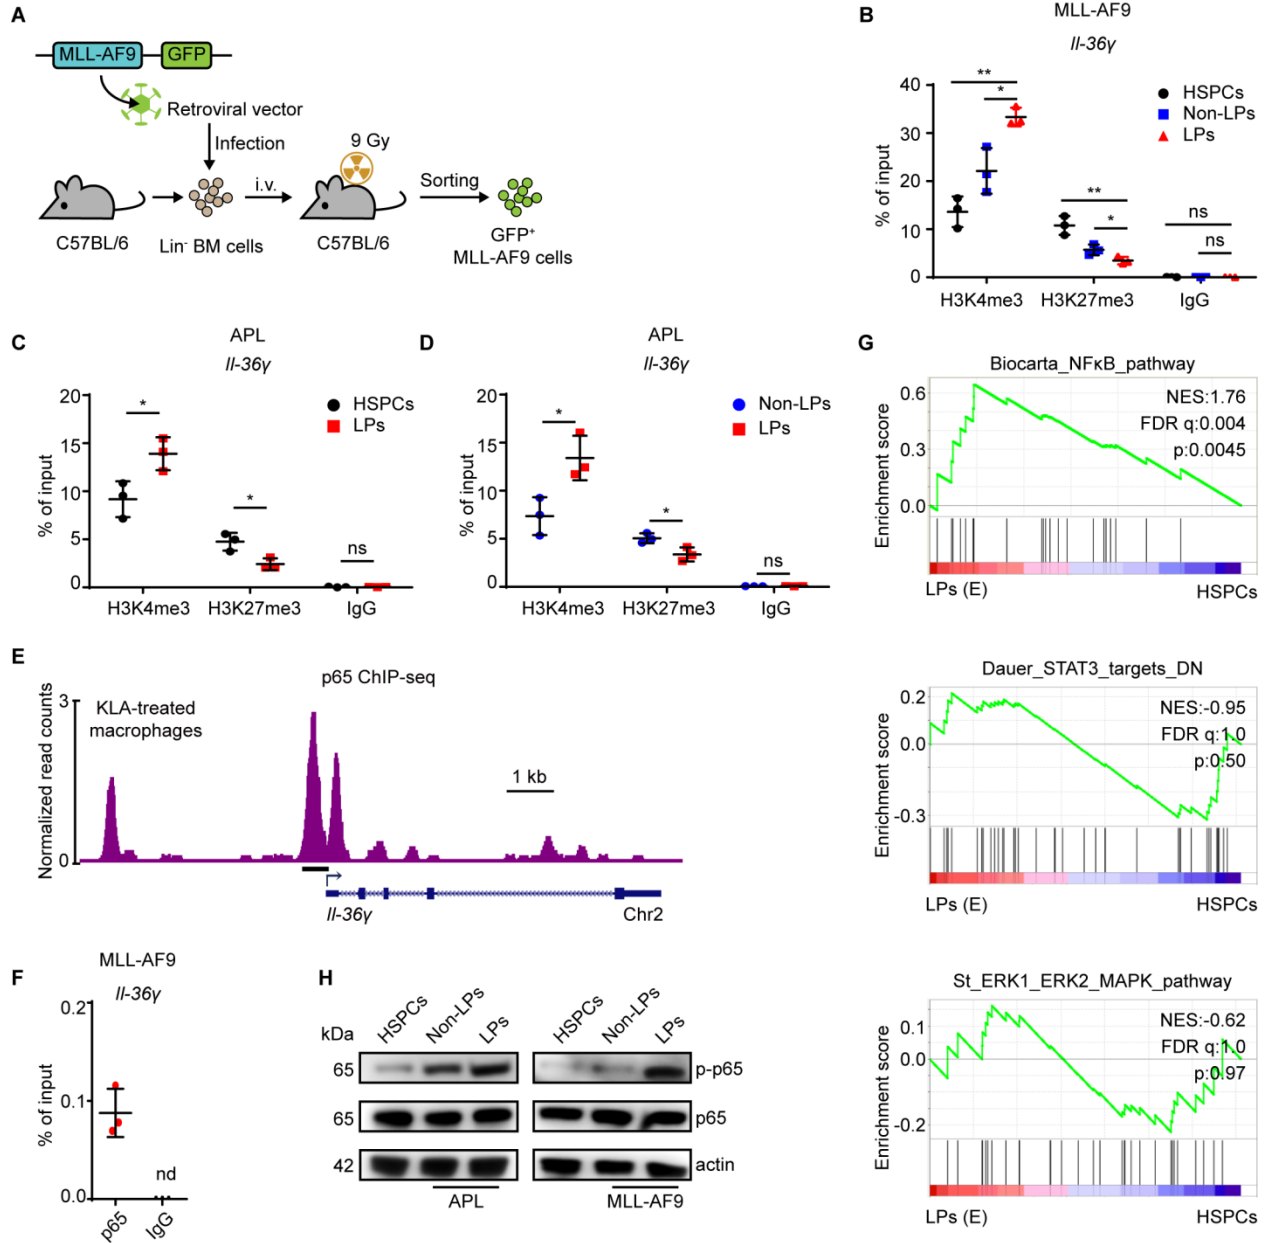

**Fig. S2. NF- $\kappa$ B pathway activates *Il-36 $\gamma$*  expression in the AML LPs.**

**(A)** Retroviral vector contained the expression cassette of MLL-AF9 and GFP infected lineage<sup>-</sup> BM cells from C57BL/6 mice. Then, these cells were transplanted into lethally irradiated (9 Gy) C57BL/6 mice. When these recipients were moribund, BM GFP<sup>+</sup> MLL-AF9 cells were sorted for experiments.

**(B-D)** ChIP-qPCR assay for H3K4me3 and H3K27me3 levels at a potential regulatory element of *Il-36 $\gamma$*  locus in HSPCs, LPs and non-LPs (n=3).

**(E-F)** ChIP-seq occupancy profiles of p65 at *Il-36 $\gamma$*  gene locus in KLA-treated mouse macrophages, and the underline indicates the location of the p65-binding site used for ChIP-qPCR analysis **(E)**. **(F)** ChIP-qPCR assay for p65 or IgG occupancy at the *Il-36 $\gamma$*  locus in the LPs (n=3).

**(G)** GSEA analysis of NF- $\kappa$ B, STAT3 and ERK pathways in APL LPs versus HSPCs.

**(H)** Western blot analysis of phosphorylated-p65 (p-p65) and p65 levels in HSPCs, LPs and non-LPs of two AML models.

Data are presented as mean  $\pm$  SD. \* $p < 0.05$ , \*\* $p < 0.01$ . ns: not significant. nd: not detected.

**Fig. S3.**

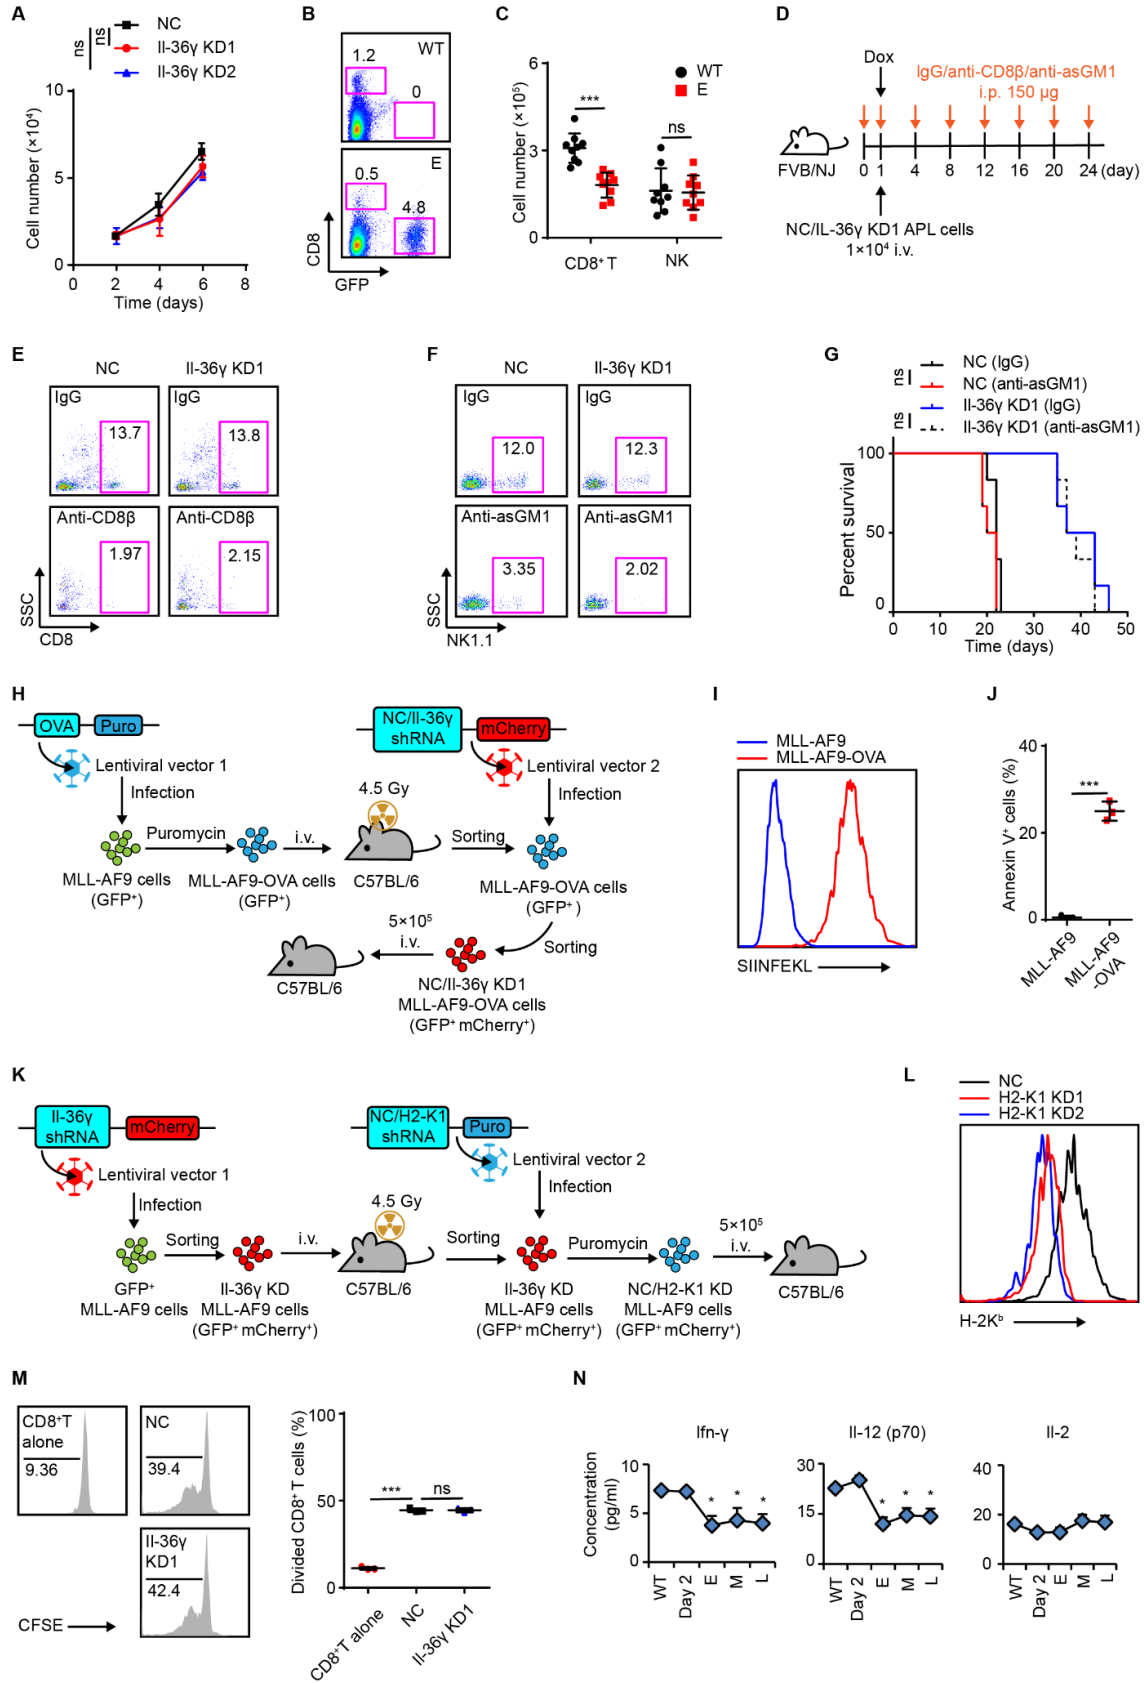

**Fig. S3. Il-36 $\gamma$  supports leukemic progression by restraining CD8<sup>+</sup> T cell-mediated immunorejection.**

(A)  $1 \times 10^4$  APL LPs were treated with Dox (1  $\mu$ g/ml) *in vitro*. The numbers of LPs were counted (n=3).

(B-C) WT FVB/NJ mice and APL mice in the E phase were sacrificed. The representative cytometric profile of BM (B), the number of CD8<sup>+</sup> T (CD3<sup>+</sup>CD8<sup>+</sup>) and NK (CD3<sup>-</sup>Nk1.1<sup>+</sup>) (C) in BM were measured (n=9 mice per group).

(D-G)  $1 \times 10^4$  NC or Il-36 $\gamma$  KD APL cells were inoculated into non-irradiated FVB/NJ and treated with IgG, anti-asGM1 or anti-CD8 $\beta$  (i.p. 150  $\mu$ g) at indicated days. Dox was given immediately after transplantation (D). Representative flow plots showed the percentages of CD8<sup>+</sup> T (E) or NK (F) in the PB of the recipients after having been treated with different antibody as indicated. (G) Survival curves of the recipients were generated (n=6 mice per group).

(H-J) Lentiviral vector 1 containing the expression cassettes of OVA and Puro infected GFP<sup>+</sup> BM MLL-AF9 cells. After puromycin selection, these cells were transplanted into sub-lethally irradiated (4.5 Gy) C57BL/6 mice. Then, GFP<sup>+</sup> MLL-AF9-OVA cells were sorted from these recipients and infected with NC or Il-36 $\gamma$  KD lentiviral vector 2. After infection,  $5 \times 10^5$  NC or Il-36 $\gamma$  KD MLL-AF9-OVA cells (GFP<sup>+</sup>mCherry<sup>+</sup>) were transplanted into non-irradiated C57BL/6 mice to establish the leukemic model (H). (I) The presentation of OVA-derived SIINFEKL peptide by H-2K<sup>b</sup> in MLL-AF9 cells or MLL-AF9-OVA cells was analyzed by flow cytometry. (J) Splenocytes from the OT-1 transgenic mice were cultured with SIINFEKL peptide (7.5  $\mu$ g/ml) for 5 days. Then, CD8<sup>+</sup> T cells were purified and cultured with MLL-AF9 cells or MLL-AF9-OVA cells at 8:1 ratio for 4 hours. After culture, leukemia cells were assessed for Annexin V staining (n=3).

**(K-L)** Lentiviral vector 1 containing the expression cassettes of Il-36 $\gamma$  KD shRNA and mCherry infected GFP<sup>+</sup> BM MLL-AF9 cells. After sorting, GFP<sup>+</sup>mCherry<sup>+</sup> Il-36 $\gamma$  KD MLL-AF9 cells were transplanted into sub-irradiated (4.5 Gy) C57BL/6 mice. Then, GFP<sup>+</sup>mCherry<sup>+</sup> Il-36 $\gamma$  KD MLL-AF9 cells isolated from these recipients were infected with NC or H2-K1 KD lentiviral vector 2. After puromycin selecting,  $5 \times 10^5$  NC or H2-K1 KD cells were transplanted into non-irradiated C57BL/6 mice for survival analysis **(K)**. **(L)** NC or H2-K1 KD MLL-AF9 cells were tested for H2-K<sup>b</sup> expression.

**(M)** Spleen CD8<sup>+</sup> T cells from FVB/NJ mice stained with CFSE were cultured alone or cultured with NC or Il-36 $\gamma$  KD APL cells at 16:1 ratio in 96-well plates coated with anti-CD3 for 3 days. Dox (1  $\mu$ g/ml) were added. The proliferation of T cells was assayed by monitoring CFSE intensity (n=3).

**(N)** The protein levels of Ifn- $\gamma$ , Il-12 (p70) and Il-2 in BM along with APL progression were assayed by cytokine array (n=8 mice per group).

Data are presented as mean  $\pm$  SD. \* $p < 0.05$ , \*\*\* $p < 0.001$ . ns: not significant.

**Fig. S4.**

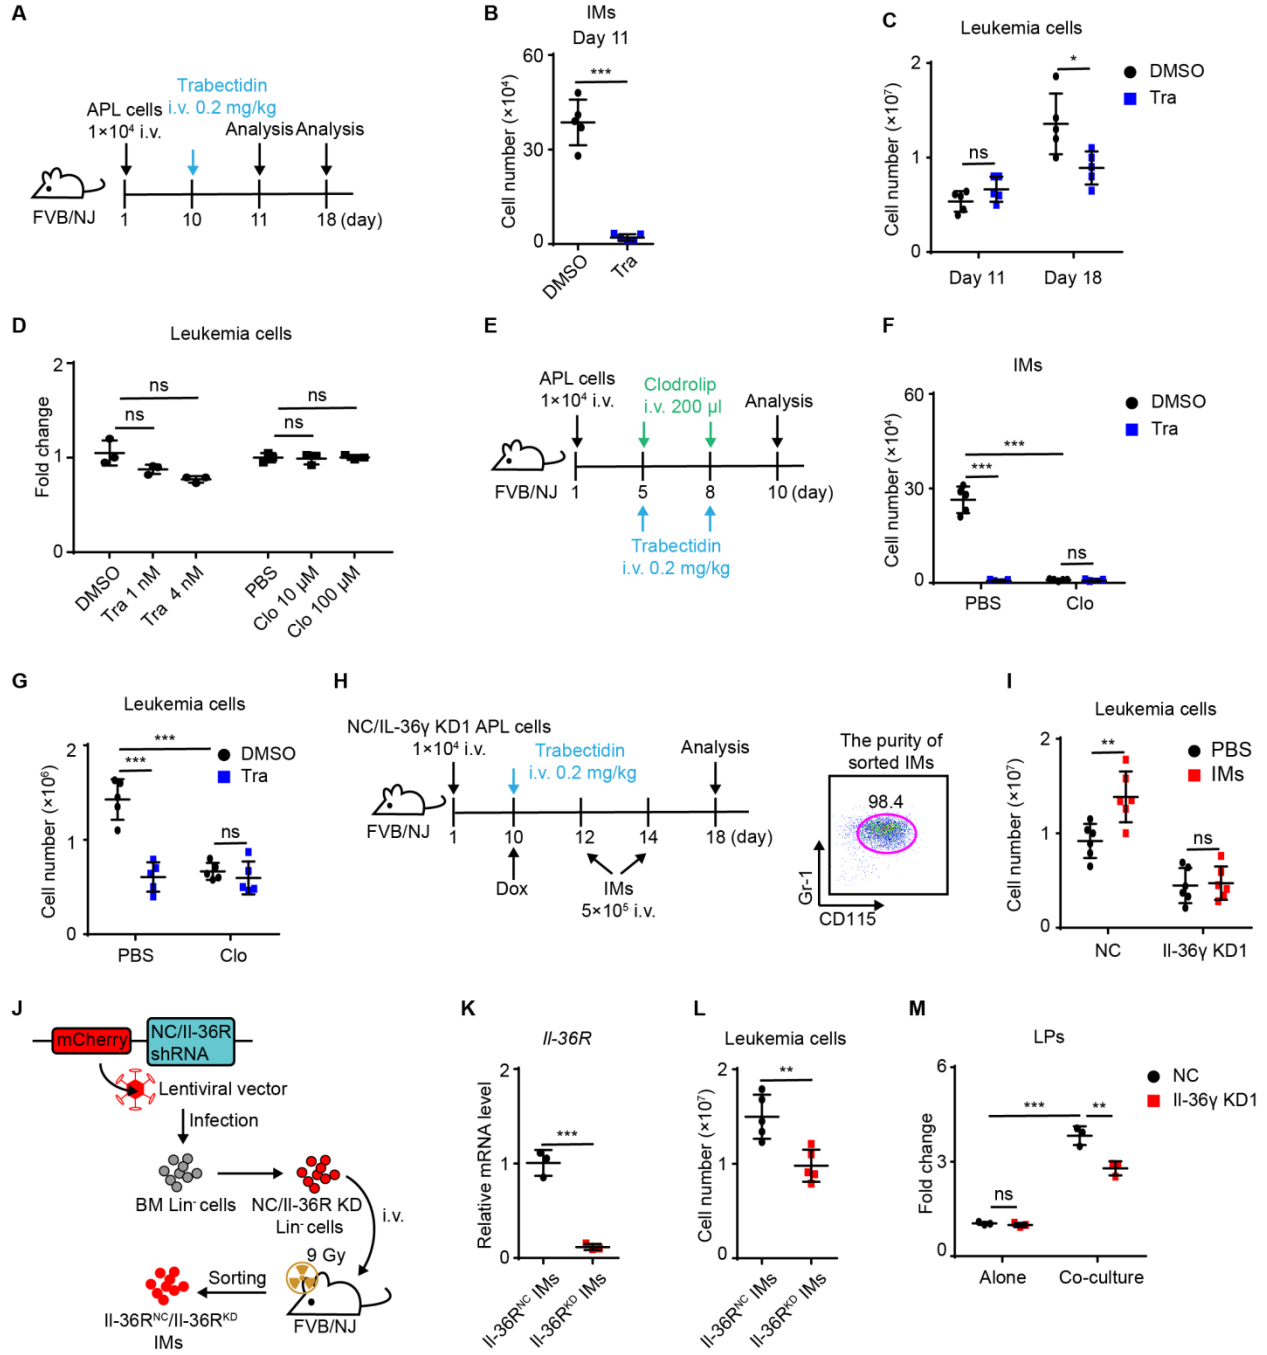

**Fig. S4. Il-36 $\gamma$ -activated IMs promote leukemic progression.**

**(A-C)** Scheme **(A)** for trabectedin treatment to APL mice. The numbers of IMs **(B)** and APL cells **(C)** in BM were counted at indicated time points (n=5 mice per group).

**(D)** APL cells were treated with different concentrations of trabectedin or clodrolip for 3 days *in vitro*. Histogram shows the relative numbers of APL cells (n=3).

**(E-G)** Scheme **(E)** for trabectedin and/or clodrolip treatment to APL mice. **(F-G)** The numbers of IMs and leukemia cells in BM at day 10 are shown (n=5 mice per group).

**(H-I)**  $1 \times 10^4$  NC or Il-36 $\gamma$  KD APL cells were inoculated into non-irradiated FVB/NJ mice.

Trabectedin was injected at day 10. Dox was supplied since day 10. Then, PBS or  $5 \times 10^5$  IMs sorted from WT FVB/NJ mice were inoculated into these APL mice at day 12 and day 14 **(H)**. **(I)** The numbers of APL cells in BM of different groups at day 18 were measured (n=6 mice per group).

**(J-L)** FVB/NJ mice-derived BM lineage<sup>-</sup> cells infected with lentiviral vector expressing Il-36R shRNA were transplanted into lethally irradiated (9 Gy) FVB/NJ mice **(J)**. **(K)** qRT-PCR

analysis of *Il-36R* mRNA level in IMs isolated from the chimeric mice (n=3). **(L)**  $1 \times 10^4$  NC APL cells were inoculated into non-irradiated FVB/NJ mice. Trabectedin was injected at day 10. Dox was supplied since day 10. Then,  $5 \times 10^5$  IMs isolated from Il-36R<sup>NC</sup> or Il-36R<sup>KD</sup> chimeric mice were inoculated into these APL mice at day 12 and day 14. The numbers of APL cells in BM of different groups at day 18 were measured (n=5 mice per group).

**(M)** APL LPs were cultured alone or cultured with IMs at 1:10 ratio for 3 days *in vitro*. Dox (1  $\mu$ g/ml) was added. Histograms show the relative numbers of the LPs after culture (n=3).

Data are presented as mean  $\pm$  SD. \* $p < 0.05$ , \*\* $p < 0.01$ , \*\*\* $p < 0.001$ . ns: not significant.



**Fig. S5.**

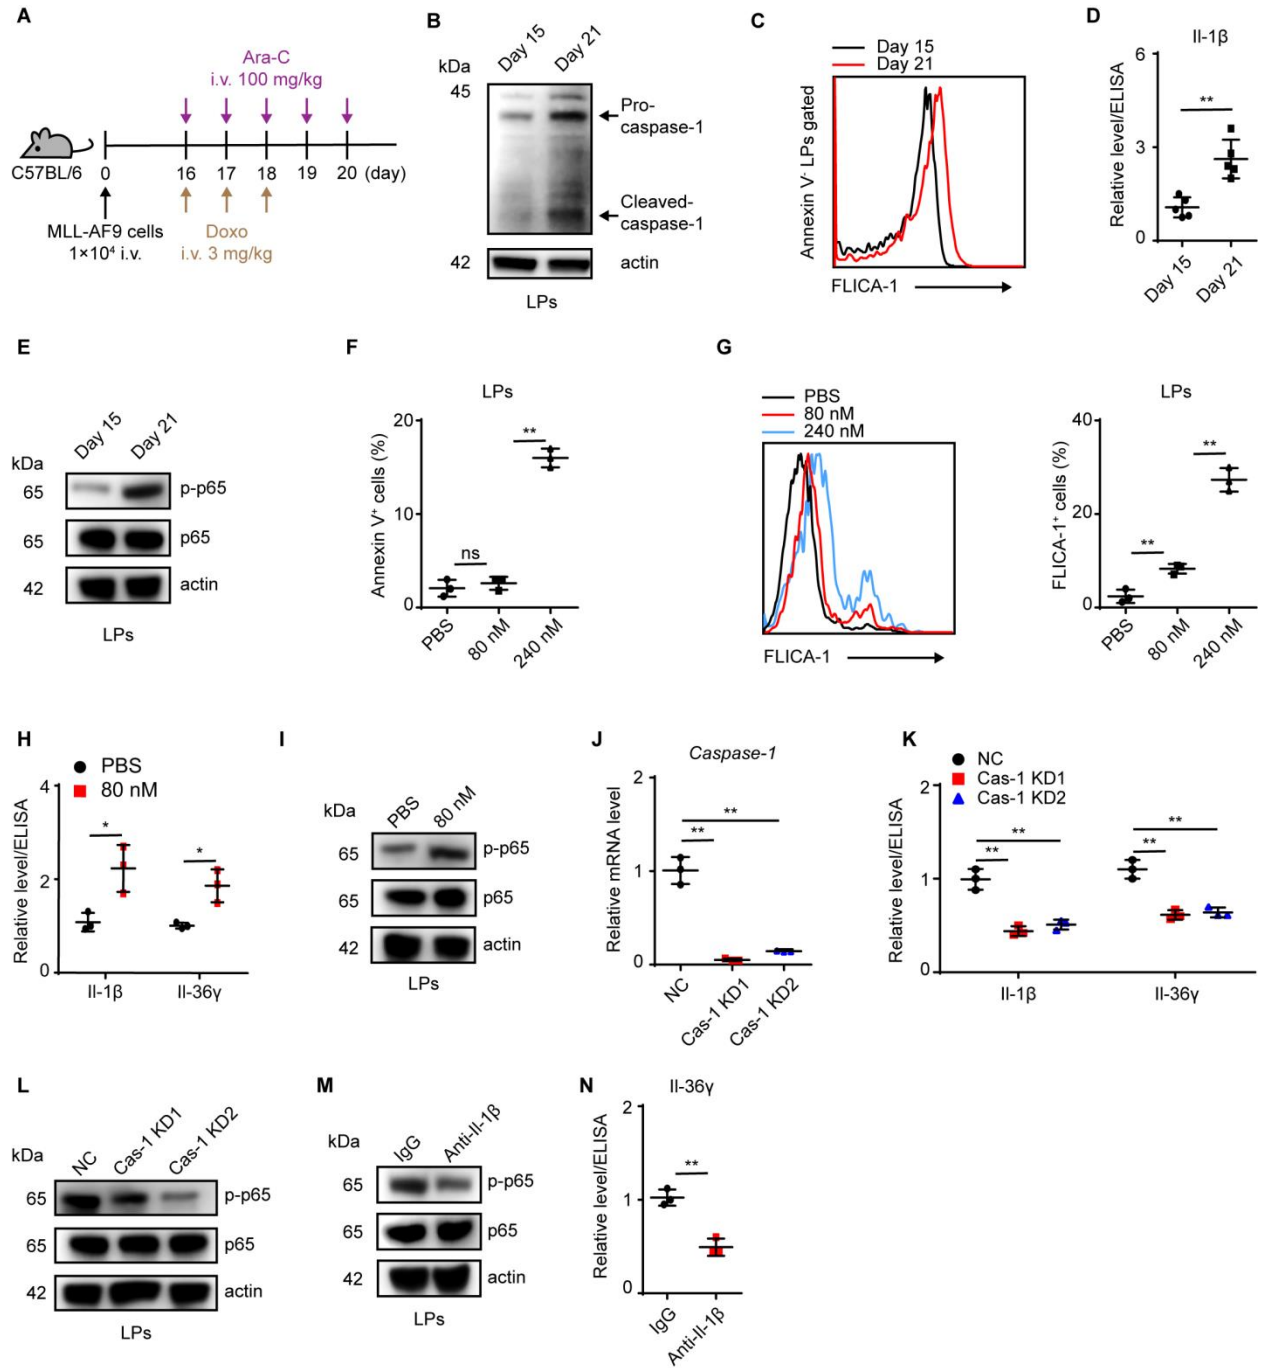

**Fig. S5. Caspase-1-Il-1 $\beta$ -NF- $\kappa$ B axis in AML LPs mediates Il-36 $\gamma$  upregulation after chemotherapy.**

**(A-E)** Scheme for the AD regimen in MLL-AF9 mice model **(A)**. **(B)** Western blot assay on the expression of caspase-1 in BM LPs at the indicated days. **(C)** Representative flow cytometric analyses of activated caspase-1 in Annexin V<sup>-</sup> BM LPs isolated at the indicated days. **(D)** BM LPs were sorted at indicated days (n=5 mice per group) and cultured *in vitro* for 3 days. Then, the relative Il-1 $\beta$  level in culture medium were measured by ELISA. **(E)** Western blot assay on the expression of p-p65 in BM LPs isolated at the indicated time points.

**(F-I)** MLL-AF9 LPs were treated with PBS or Ara-C for 48 hours *in vitro*. Cell death **(F)** and caspase-1 activation **(G)** were measured using Annexin V staining and FLICA-1 fluorescent probes (n=3). **(H)** The relative levels of Il-1 $\beta$  and Il-36 $\gamma$  in culture medium were measured by ELISA (n=3). **(I)** The levels of p-p65 were measured by western blot.

**(J-L)** NC or Caspase-1 KD MLL-AF9 LPs were treated with Ara-C (80 nM) for 48 hours *in vitro*. **(J)** qRT-PCR analysis of *Caspase-1* mRNA level as indicated (n=3). **(K)** The levels of Il-1 $\beta$  and Il-36 $\gamma$  in culture medium were measured by ELISA (n=3). **(L)** The levels of p65 and p-p65 were measured by western blot.

**(M-N)** MLL-AF9 LPs were treated with Ara-C (80 nM) for 48 hours in presence of IgG or anti-Il-1 $\beta$  antibody (100  $\mu$ g/ml) *in vitro*. **(M)** The levels of p65 and p-p65 were measured by western blot. **(N)** The level of Il-36 $\gamma$  in culture medium was measured by ELISA (n=3).

Data are presented as mean  $\pm$  SD. \* $p$  < 0.05, \*\* $p$  < 0.01. ns: not significant.

**Fig. S6.**

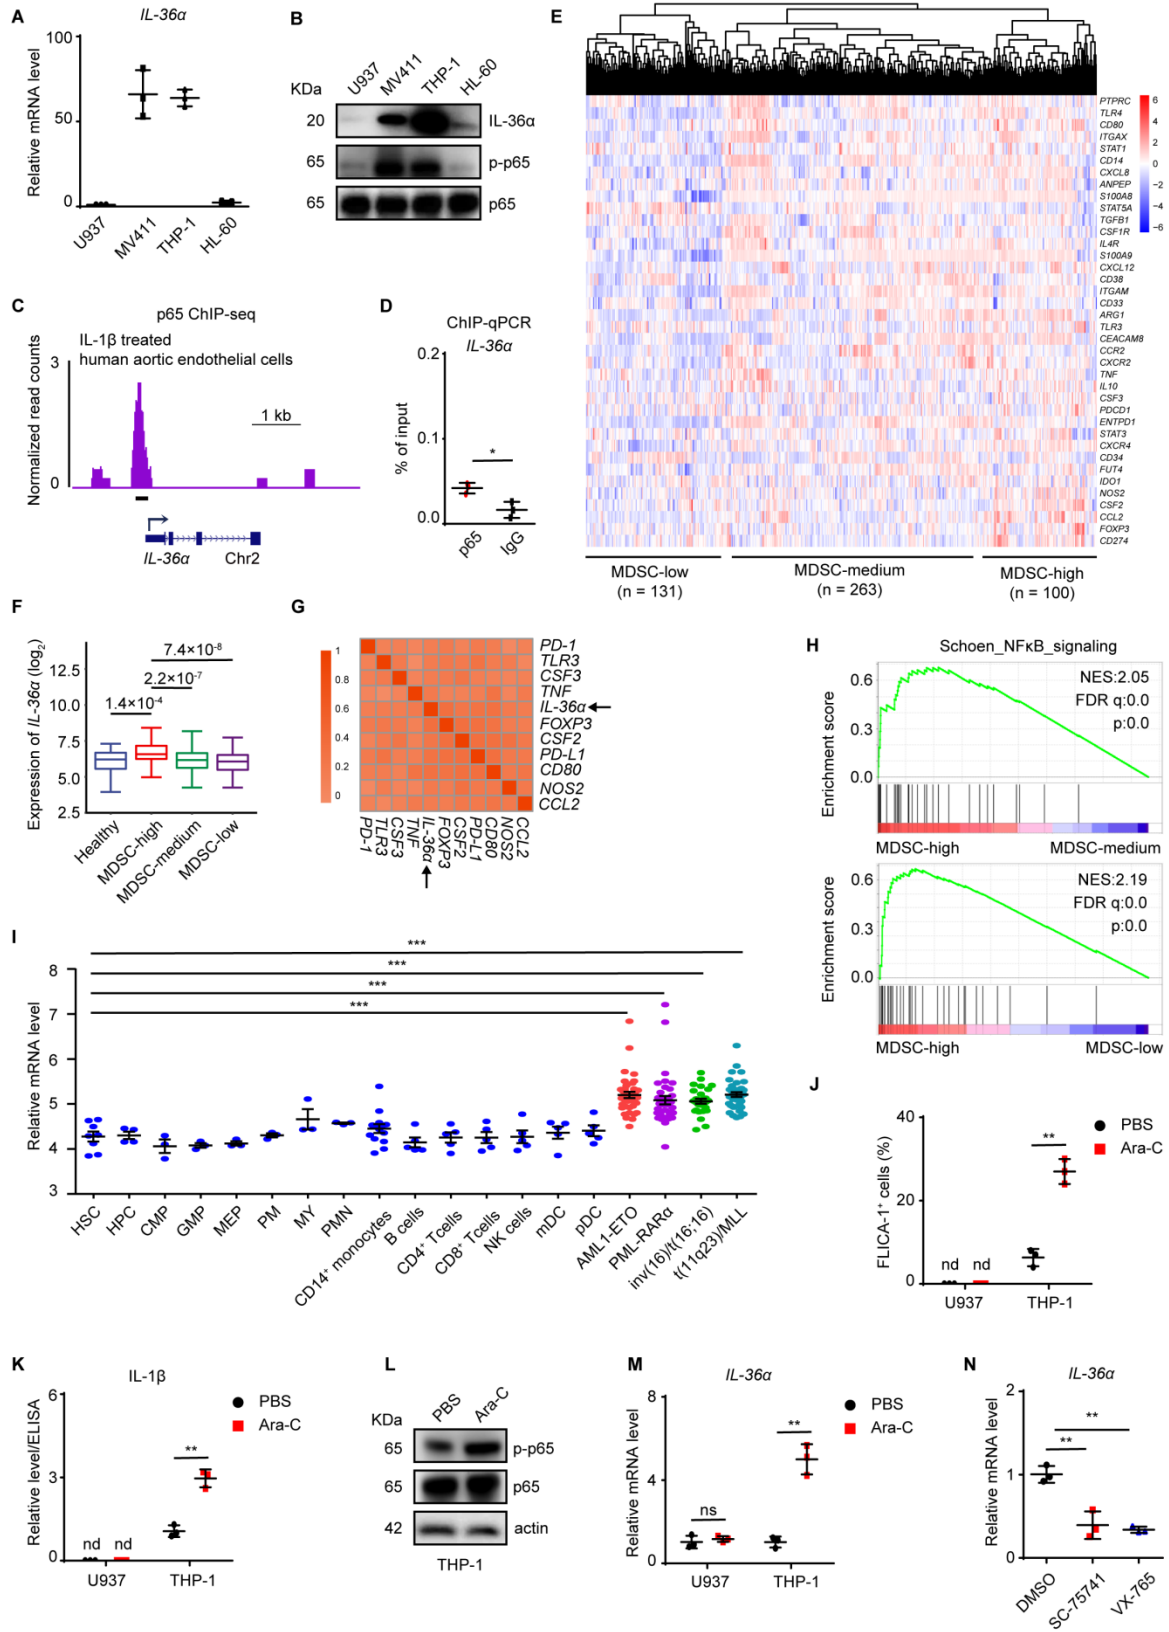

**Fig. S6. IL-36 $\alpha$  is upregulated in human AML blasts.**

(A) qRT-PCR assay on the mRNA levels of *IL-36 $\alpha$*  in human leukemia cell lines (n=3).

(B) The levels of p-p65, p65 and *IL-36 $\alpha$*  in human leukemia cell lines were measured by western blot.

(C-D) ChIP-seq occupancy profiles of the NF- $\kappa$ B p65 at *IL-36 $\alpha$*  gene locus in IL-1 $\beta$ -treated human aortic endothelial cells, and the underline indicates the location of binding sequence used for ChIP-qPCR analysis (C). (D) ChIP-qPCR assay for p65 or IgG occupancy at the *IL-36 $\alpha$*  locus in THP-1 cells (n=3).

(E-H) Unsupervised clustering of 494 human AML samples into MDSC-high, MDSC-low and MDSC-medium groups using a 39-gene MDSC signature (E). (F) *IL-36 $\alpha$*  mRNA levels in healthy and three groups of AML samples. (G) Pearson correlation analysis identified top ten MDSC signature genes highly correlated with the *IL-36 $\alpha$*  expression among 494 AML samples.

(H) GSEA shows that the expression of signature genes of NF- $\kappa$ B pathway was more enriched in the MDSC-high group compared to the MDSC-medium or MDSC-low group.

(I) Analysis of *IL-36 $\alpha$*  mRNA level in BM HSC (hematopoietic stem cells), HPC (hematopoietic progenitor cells), CMP (common myeloid progenitors), GMP (granulocyte monocyte progenitors), MEP (megakaryocyte erythroid progenitors), PM (promyelocyte), MY (myelocyte), PMN (polymorphonuclear cells), CD14<sup>+</sup> monocytes, B cells, CD4<sup>+</sup> T cells, CD8<sup>+</sup> T cells, NK cells, mDC, pDC, primary AML BM blastic samples with AML1-ETO fusion protein (n=39), with PML-RAR $\alpha$  fusion protein (n=37), with inv(16)/t(16;16) (n=28) and with t(11q23)/MLL (n=38) using HemaExplorer database. Datasets from HemaExplorer were first separated into batches according to platform and laboratory. These batches were normalized using robust multi-array average (RMA) method provided in the affy package in R. Batch effects were corrected

using ComBat.

**(J-M)** Leukemia cells were treated with PBS or Ara-C (200 nM) for 72 hours. The activated caspase-1 **(J)**, the p-p65 level **(L)** and the mRNA level of *Il-36α* (n=3) **(M)** in leukemia cells are shown. **(K)** The relative levels of IL-1β in culture medium were assayed by ELISA (n=3).

**(N)** THP-1 cells were treated with Ara-C (200 nM) in presence or absence of the inhibitor of Caspase-1 (VX-765, 100 μM) or NF-κB (SC-75741, 5 μM) for 72 hours. The mRNA level of *Il-36α* was assayed by qRT-PCR (n=3).

Data are presented as mean ± SD. \* $p < 0.05$ , \*\* $p < 0.01$ , \*\*\* $p < 0.001$ . ns: not significant. nd: not detected.

**Fig. S7.**

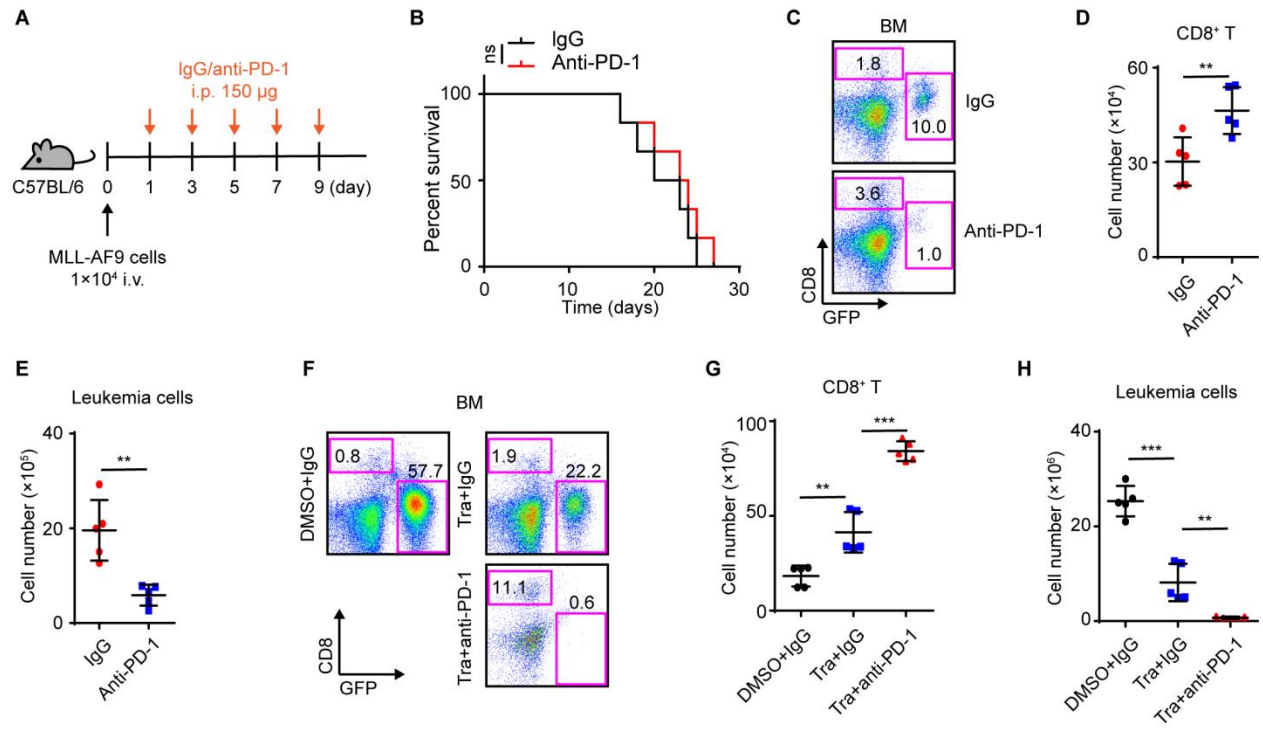

**Fig. S7. Il-36 $\gamma$  knockdown or IM depletion improves the response of AML to anti-PD-1 therapy.**

**(A-B)** Scheme for anti-PD-1 treatment to MLL-AF9 mice model **(A)**. **(B)** Survival curves of the leukemic mice (n=6 mice per group) are shown.

**(C-E)**  $1 \times 10^4$  Il-36 $\gamma$  KD MLL-AF9 cells were inoculated into non-irradiated recipients and treated as described in Fig. S7A. The mice were sacrificed at day 11. The representative flow cytometric analysis of BM **(C)**, the number of T cells **(D)** and leukemia cells **(E)** in BM are shown (n=5 mice per group).

**(F-H)**  $1 \times 10^4$  MLL-AF9 cells were inoculated into non-irradiated recipients and treated as described in Fig. S7A. DMSO or trabectedin (i.v. 0.2 mg/kg) were injected at day 1, 5, 9. The mice were sacrificed at day 15. The representative flow cytometric analysis of BM **(F)**, and the numbers of T cells **(G)** and leukemia cells **(H)** in BM are shown (n=5 mice per group).

Data are presented as mean  $\pm$  SD. \*\* $p < 0.01$ , \*\*\* $p < 0.001$ . ns: not significant.

**Table S1. General patient information of 15 leukemia samples used in this study.**

| Sample_ID<br>in text | Age<br>(yrs) | Gender | Specimen                                 | FAB<br>subtype | Index                   |
|----------------------|--------------|--------|------------------------------------------|----------------|-------------------------|
| AML#1                | 44           | Male   | BM supernatant                           | M0             | F6A                     |
| AML#2                | 18           | Male   | BM supernatant                           | M2             | F6A                     |
| AML#3                | 54           | Male   | BM supernatant                           | M2             | F6A                     |
| AML#4                | 43           | Male   | BM supernatant/CM/FC                     | M4             | F6A,<br>F6K-M           |
| AML#5                | 67           | Female | BM<br>supernatant/CM/FC/LPs<br>RNA       | M5             | F6A,<br>F6D,<br>F6K-O   |
| AML#6                | 36           | Male   | BM supernatant/CM/FC                     | M4             | F6A,<br>F6K-O           |
| AML#7                | 43           | Female | BM supernatant/CM/FC                     | M4             | F6A,<br>F6K-M           |
| AML#8                | 75           | Male   | BM supernatant/CM/FC                     | M5             | F6A,<br>F6K-L           |
| AML#9                | 44           | Male   | BM supernatant/CM/LPs<br>RNA/Non-LPs RNA | M4             | F6A,<br>F6D-J           |
| AML#10               | 50           | Male   | BM supernatant/LPs<br>RNA/Non-LPs RNA/CM | M4             | F6A,<br>F6D-H           |
| AML#11               | 45           | Male   | BM supernatant/CM/LPs<br>RNA/Non-LPs RNA | M5             | F6A,<br>F6D-E,<br>F6I-J |
| AML#12               | 35           | Male   | CM/LPs RNA/Non-LPs                       | M5             | F6D-H                   |



|        |    |        | RNA           |              |               |
|--------|----|--------|---------------|--------------|---------------|
| AML#13 | 63 | Male   | CM/FC/LPs RNA | Unclassified | F6D,<br>F6K-L |
| AML#14 | 32 | Male   | CM/FC         | M5           | F6K-L         |
| AML#15 | 71 | Female | CM/FC         | Non-M3       | F6K-L         |

BM, Bone marrow; CM, Conditioned medium; FC, Flow cytometry; LPs, Leukemic progenitor cells; F,  
Figure.

## REFERENCES AND NOTES

1. N. J. Short, S. Zhou, C. Fu, D. A. Berry, R. B. Walter, S. D. Freeman, C. S. Hourigan, X. Huang, G. Nogueras Gonzalez, H. Hwang, X. Qi, H. Kantarjian, F. Ravandi, Association of measurable residual disease with survival outcomes in patients with acute myeloid leukemia: A systematic review and meta-analysis. *JAMA Oncol.* **6**, 1890–1899 (2020).
2. M. J. Christopher, A. A. Petti, M. P. Rettig, C. A. Miller, E. Chendamarai, E. J. Duncavage, J. M. Klco, N. M. Helton, M. O’Laughlin, C. C. Fronick, R. S. Fulton, R. K. Wilson, L. D. Wartman, J. S. Welch, S. E. Heath, J. D. Baty, J. E. Payton, T. A. Graubert, D. C. Link, M. J. Walter, P. Westervelt, T. J. Ley, J. F. DiPersio, Immune escape of relapsed AML cells after allogeneic transplantation. *N. Engl. J. Med.* **379**, 2330–2341 (2018).
3. C. Toffalori, L. Zito, V. Gambacorta, M. Riba, G. Oliveira, G. Bucci, M. Barcella, O. Spinelli, R. Greco, L. Crucitti, N. Cieri, M. Noviello, F. Manfredi, E. Montaldo, R. Ostuni, M. M. Naldini, B. Gentner, M. Waterhouse, R. Zeiser, J. Finke, M. Hanoun, D. W. Beelen, I. Gojo, L. Luznik, M. Onozawa, T. Teshima, R. Devillier, D. Blaise, C. J. M. Halkes, M. Griffioen, M. G. Carrabba, M. Bernardi, J. Peccatori, C. Barlassina, E. Stupka, D. Lazarevic, G. Tonon, A. Rambaldi, D. Cittaro, C. Bonini, K. Fleischhauer, F. Ciceri, L. Vago, Immune signature drives leukemia escape and relapse after hematopoietic cell transplantation. *Nat. Med.* **25**, 603–611 (2019).
4. N. Daver, G. Garcia-Manero, S. Basu, P. C. Boddu, M. Alfayez, J. E. Cortes, M. Konopleva, F. Ravandi-Kashani, E. Jabbour, T. Kadia, G. M. Nogueras-Gonzalez, J. Ning, N. Pemmaraju, C. D. DiNardo, M. Andreeff, S. A. Pierce, T. Gordon, S. M. Kornblau, W. Flores, Z. Alhamal, C. Bueso-Ramos, J. L. Jorgensen, K. P. Patel, J. Blando, J. P. Allison, P. Sharma, H. Kantarjian, Efficacy, safety, and biomarkers of response to azacitidine and nivolumab in relapsed/refractory acute myeloid leukemia: A nonrandomized, open-label, phase II study. *Cancer Discov.* **9**, 370–383 (2019).
5. F. S. Lichtenegger, C. Krupka, S. Haubner, T. Kohnke, M. Subklewe, Recent developments in immunotherapy of acute myeloid leukemia. *J. Hematol. Oncol.* **10**, 142 (2017).

6. J. Vadakekolathu, M. D. Minden, T. Hood, S. E. Church, S. Reeder, H. Altmann, A. H. Sullivan, E. J. Viboch, T. Patel, N. Ibrahimova, S. E. Warren, A. Arruda, Y. Liang, T. H. Smith, G. A. Foulds, M. D. Bailey, J. Gowen-MacDonald, J. Muth, M. Schmitz, A. Cesano, A. G. Pockley, P. J. M. Valk, B. Löwenberg, M. Bornhäuser, S. K. Tasian, M. P. Rettig, J. K. Davidson-Moncada, J. F. DiPersio, S. Rutella, Immune landscapes predict chemotherapy resistance and immunotherapy response in acute myeloid leukemia. *Sci. Transl. Med.* **12**, eaaz0463 (2020).
7. R. P. Gale, G. Opelz, Commentary: Does immune suppression increase risk of developing acute myeloid leukemia? *Leukemia* **26**, 422–423 (2012).
8. A. M. Paczulla, K. Rothfelder, S. Raffel, M. Konantz, J. Steinbacher, H. Wang, C. Tandler, M. Mbarga, T. Schaefer, M. Falcone, E. Nievergall, D. Dörfel, P. Hanns, J. R. Passweg, C. Lutz, J. Schwaller, R. Zeiser, B. R. Blazar, M. A. Caligiuri, S. Dirnhofer, P. Lundberg, L. Kanz, L. Quintanilla-Martinez, A. Steinle, A. Trumpp, H. R. Salih, C. Lengerke, Absence of NKG2D ligands defines leukaemia stem cells and mediates their immune evasion. *Nature* **572**, 254–259 (2019).
9. P. van Galen, V. Hovestadt, M. H. Wadsworth Ii, T. K. Hughes, G. K. Griffin, S. Battaglia, J. A. Verga, J. Stephansky, T. J. Pastika, J. L. Story, G. S. Pinkus, O. Pozdnyakova, I. Galinsky, R. M. Stone, T. A. Graubert, A. K. Shalek, J. C. Aster, A. A. Lane, B. E. Bernstein, Single-cell RNA-seq reveals AML hierarchies relevant to disease progression and immunity. *Cell* **176**, 1265–1281.e24 (2019).
10. L. I. Shlush, A. Mitchell, L. Heisler, S. Abelson, S. W. K. Ng, A. Trotman-Grant, J. J. F. Medeiros, A. Rao-Bhatia, I. Jaciw-Zurakowsky, R. Marke, J. L. McLeod, M. Doedens, G. Bader, V. Voisin, C.J. Xu, J. D. McPherson, T. J. Hudson, J. C. Y. Wang, M. D. Minden, J. E. Dick, Tracing the origins of relapse in acute myeloid leukaemia to stem cells. *Nature* **547**, 104–108 (2017).
11. D. Thomas, R. Majeti, Biology and relevance of human acute myeloid leukemia stem cells. *Blood* **129**, 1577–1585 (2017).
12. C. Garlanda, C. A. Dinarello, A. Mantovani, The interleukin-1 family: Back to the future. *Immunity* **39**, 1003–1018 (2013).

13. M. S. Gresnigt, F. L. van de Veerdonk, Biology of IL-36 cytokines and their role in disease. *Semin. Immunol.* **25**, 458–465 (2013).
14. E. Y. Bassoy, J. E. Towne, C. Gabay, Regulation and function of interleukin-36 cytokines. *Immunol. Rev.* **281**, 169–178 (2018).
15. X. Wang, X. Zhao, C. Feng, A. Weinstein, R. Xia, W. Wen, Q. Lv, S. Zuo, P. Tang, X. Yang, X. Chen, H. Wang, S. Zang, L. Stollings, T. L. Denning, J. Jiang, J. Fan, G. Zhang, X. Zhang, Y. Zhu, W. Storkus, B. Lu, IL-36 $\gamma$  transforms the tumor microenvironment and promotes type 1 lymphocyte-mediated antitumor immune responses. *Cancer Cell* **28**, 296–306 (2015).
16. A. Carey, D. K. Edwards V, C. A. Eide, L. Newell, E. Traer, B. C. Medeiros, D. A. Pollyea, M. W. Deininger, R. H. Collins, J. W. Tyner, B. J. Druker, G. C. Bagby, S. K. McWeeney, A. Agarwal, Identification of interleukin-1 by functional screening as a key mediator of cellular expansion and disease progression in acute myeloid leukemia. *Cell Rep.* **18**, 3204–3218 (2017).
17. D. Brown, S. Kogan, E. Lagasse, I. Weissman, M. Alcalay, P. G. Pelicci, S. Atwater, J. M. Bishop, A PMLRAR $\alpha$  transgene initiates murine acute promyelocytic leukemia. *Proc. Natl. Acad. Sci. U.S.A.* **94**, 2551–2556 (1997).
18. X. Liu, J. Chen, S. Yu, L. Yan, H. Guo, J. Dai, W. Zhang, J. Zhu, All-trans retinoic acid and arsenic trioxide fail to derepress the monocytic differentiation driver Irf8 in acute promyelocytic leukemia cells. *Cell Death Dis.* **8**, e2782 (2017).
19. B. O. Zhou, L. Ding, S. J. Morrison, Hematopoietic stem and progenitor cells regulate the regeneration of their niche by secreting Angiopoietin-1. *eLife* **4**, e05521 (2015).
20. J. L. Zhao, C. Ma, R. M. O’Connell, A. Mehta, R. DiLoreto, J. R. Heath, D. Baltimore, Conversion of danger signals into cytokine signals by hematopoietic stem and progenitor cells for regulation of stress-induced hematopoiesis. *Cell Stem Cell* **14**, 445–459 (2014).
21. M. Chapellier, P. Peña-Martínez, R. Ramakrishnan, M. Eriksson, M. S. Talkhoncheh, C. Orsmark-Pietras, H. Lilljebjörn, C. Högberg, A. Hagström-Andersson, T. Fioretos, J. Larsson, M. Järås,

Arrayed molecular barcoding identifies TNFSF13 as a positive regulator of acute myeloid leukemia-initiating cells. *Haematologica* **104**, 2006–2016 (2019).

22. H. Z. Guo, L.-T. Niu, W.-T. Qiang, J. Chen, J. Wang, H. Yang, W. Zhang, J. Zhu, S.-H. Yu, Leukemic IL-17RB signaling regulates leukemic survival and chemoresistance. *FASEB J.* **33**, 9565–9576 (2019).
23. M. L. Guzman, S. J. Neering, D. Upchurch, B. Grimes, D. S. Howard, D. A. Rizzieri, S. M. Luger, C. T. Jordan, Nuclear factor- $\kappa$ B is constitutively activated in primitive human acute myelogenous leukemia cells. *Blood* **98**, 2301–2307 (2001).
24. H.-P. Kuo, Z. Wang, D.-F. Lee, M. Iwasaki, J. Duque-Afonso, S. H. K. Wong, C.-H. Lin, M. E. Figueroa, J. Su, I. R. Lemischka, M. L. Cleary, Epigenetic roles of MLL oncoproteins are dependent on NF- $\kappa$ B. *Cancer Cell* **24**, 423–437 (2013).
25. Y. Kagoya, A. Yoshimi, K. Kataoka, M. Nakagawa, K. Kumano, S. Arai, H. Kobayashi, T. Saito, Y. Iwakura, M. Kurokawa, Positive feedback between NF- $\kappa$ B and TNF- $\alpha$  promotes leukemia-initiating cell capacity. *J. Clin. Invest.* **124**, 528–542 (2014).
26. M. Deng, X. Gui, J. Kim, L. Xie, W. Chen, Z. Li, L. He, Y. Chen, H. Chen, W. Luo, Z. Lu, J. Xie, H. Churchill, Y. Xu, Z. Zhou, G. Wu, C. Yu, S. John, K. Hirayasu, N. Nguyen, X. Liu, F. Huang, L. Li, H. Deng, H. Tang, A. H. Sadek, L. Zhang, T. Huang, Y. Zou, B. Chen, H. Zhu, H. Arase, N. Xia, Y. Jiang, R. Collins, M. J. You, J. Homsy, N. Unni, C. Lewis, G.-Q. Chen, Y.-X. Fu, X. C. Liao, Z. An, J. Zheng, N. Zhang, C. C. Zhang, LILRB4 signalling in leukaemia cells mediates T cell suppression and tumour infiltration. *Nature* **562**, 605–609 (2018).
27. N. Tsurutani, P. Mittal, M.C. St. Rose, S. M. Ngoi, J. Svedova, A. Menoret, F. B. Treadway, R. Laubenbacher, J. E. Suárez-Ramírez, L. S. Cauley, A. J. Adler, A. T. Vella, Costimulation endows immunotherapeutic CD8 T cells with IL-36 responsiveness during aerobic glycolysis. *J. Immunol.* **196**, 124–134 (2016).
28. F. Veglia, M. Perego, D. Gabrilovich, Myeloid-derived suppressor cells coming of age. *Nat. Immunol.* **19**, 108–119 (2018).

29. G. Germano, R. Frapolli, C. Belgiovine, A. Anselmo, S. Pesce, M. Liguori, E. Erba, S. Uboldi, M. Zucchetti, F. Pasqualini, M. Nebuloni, N. van Rooijen, R. Mortarini, L. Beltrame, S. Marchini, I. Fuso Nerini, R. Sanfilippo, P. G. Casali, S. Pilotti, C. M. Galmarini, A. Anichini, A. Mantovani, M. D'Incalci, P. Allavena, Role of macrophage targeting in the antitumor activity of trabectedin. *Cancer Cell* **23**, 249–262 (2013).
30. G. Galletti, F. Caligaris-Cappio, M. T. S. Bertilaccio, B cells and macrophages pursue a common path toward the development and progression of chronic lymphocytic leukemia. *Leukemia* **30**, 2293–2301 (2016).
31. C. D. Conrady, M. Zheng, N. A. Mandal, N. van Rooijen, D. J. J. Carr, IFN- $\alpha$ -driven CCL2 production recruits inflammatory monocytes to infection site in mice. *Mucosal Immunol.* **6**, 45–55 (2013).
32. B. S. Hanna, F. McClanahan, H. Yazdanparast, N. Zaborsky, V. Kalter, P. M. Rößner, A. Benner, C. Dürr, A. Egle, J. G. Gribben, P. Lichter, M. Seiffert, Depletion of CLL-associated patrolling monocytes and macrophages controls disease development and repairs immune dysfunction in vivo. *Leukemia* **30**, 570–579 (2016).
33. K. Liang, A. G. Volk, J. S. Haug, S. A. Marshall, A. R. Woodfin, E. T. Bartom, J. M. Gilmore, L. Florens, M. P. Washburn, K. D. Sullivan, J. M. Espinosa, J. Cannova, J. Zhang, E. R. Smith, J. D. Crispino, A. Shilatifard, Therapeutic targeting of MLL degradation pathways in MLL-rearranged leukemia. *Cell* **168**, 59–72.e13 (2017).
34. M. Bruchard, G. Mignot, V. Derangère, F. Chalmin, A. Chevriaux, F. Végran, W. Boireau, B. Simon, B. Ryffel, J. L. Connat, J. Kanellopoulos, F. Martin, C. Rébé, L. Apetoh, F. Ghiringhelli, Chemotherapy-triggered cathepsin B release in myeloid-derived suppressor cells activates the Nlrp3 inflammasome and promotes tumor growth. *Nat. Med.* **19**, 57–64 (2013).
35. T. Haferlach, A. Kohlmann, L. Wiczorek, G. Basso, G. T. Kronnie, M.C. Béné, J. De Vos, J. M. Hernández, W.-K. Hofmann, K. I. Mills, A. Gilkes, S. Chiaretti, S. A. Shurtleff, T. J. Kipps, L. Z. Rassenti, A. E. Yeoh, P. R. Papenhausen, W.-M. Liu, P. M. Williams, R. Foà, Clinical utility of microarray-based gene expression profiling in the diagnosis and subclassification of leukemia:

Report from the International Microarray Innovations in Leukemia Study Group. *J. Clin. Oncol.* **28**, 2529–2537 (2010).

36. A. Kohlmann, T. J. Kipps, L. Z. Rassenti, J. R. Downing, S. A. Shurtleff, K. I. Mills, A. F. Gilkes, W.-K. Hofmann, G. Basso, M. C. Dell'Orto, R. Foà, S. Chiaretti, J. De Vos, S. Rauhut, P. R. Papenhausen, J. M. Hernández, E. Lumbreras, A. E. Yeoh, E. S. Koay, R. Li, W.-M. Liu, P. M. Williams, L. Wiczorek, T. Haferlach, An international standardization programme towards the application of gene expression profiling in routine leukaemia diagnostics: The Microarray Innovations in LEukemia study prephase. *Br. J. Haematol.* **142**, 802–807 (2008).
37. G. Wang, X. Lu, P. Dey, P. Deng, C. C. Wu, S. Jiang, Z. Fang, K. Zhao, R. Konaparthi, S. Hua, J. Zhang, E. M. Li-Ning-Tapia, A. Kapoor, C.J. Wu, N. B. Patel, Z. Guo, V. Ramamoorthy, T. N. Tieu, T. Heffernan, D. Zhao, X. Shang, S. Khadka, P. Hou, B. Hu, E.J. Jin, W. Yao, X. Pan, Z. Ding, Y. Shi, L. Li, Q. Chang, P. Troncoso, C. J. Logothetis, M. J. McArthur, L. Chin, Y. A. Wang, R. A. DePinho, Targeting YAP-dependent MDSC infiltration impairs tumor progression. *Cancer Discov.* **6**, 80–95 (2016).
38. H. Gal, N. Amariglio, L. Trakhtenbrot, J. Jacob-Hirsh, O. Margalit, A. Avigdor, A. Nagler, S. Tavor, L. Ein-Dor, T. Lapidot, E. Domany, G. Rechavi, D. Givol, Gene expression profiles of AML derived stem cells; similarity to hematopoietic stem cells. *Leukemia* **20**, 2147–2154 (2006).
39. D. C. Johnson, C. Y. Taabazuing, M. C. Okondo, A. J. Chui, S. D. Rao, F. C. Brown, C. Reed, E. Peguero, E. de Stanchina, A. Kentsis, D. A. Bachovchin, DPP8/DPP9 inhibitor-induced pyroptosis for treatment of acute myeloid leukemia. *Nat. Med.* **24**, 1151–1156 (2018).
40. X. Lu, J. W. Horner, E. Paul, X. Shang, P. Troncoso, P. Deng, S. Jiang, Q. Chang, D. J. Spring, P. Sharma, J. A. Zebala, D. Y. Maeda, Y. A. Wang, R. A. DePinho, Effective combinatorial immunotherapy for castration-resistant prostate cancer. *Nature* **543**, 728–732 (2017).
41. S. M. Crusz, F. R. Balkwill, Inflammation and cancer: Advances and new agents. *Nat. Rev. Clin. Oncol.* **12**, 584–596 (2015).

42. L. Wang, B. Jia, D. F. Claxton, W. C. Ehmann, W. B. Rybka, S. Mineishi, S. Naik, M. R. Khawaja, J. Sivik, J. Han, R. J. Hohl, H. Zheng, VISTA is highly expressed on MDSCs and mediates an inhibition of T cell response in patients with AML. *Onco. Targets Ther.* **7**, e1469594 (2018).
43. A. R. Pyzer, D. Stroopinsky, H. Rajabi, A. Washington, A. Tagde, M. Coll, J. Fung, M. P. Bryant, L. Cole, K. Palmer, P. Somaiya, R. Karp Leaf, M. Nahas, A. Apel, S. Jain, M. McMasters, L. Mendez, J. Levine, R. Joyce, J. Arnason, P. P. Pandolfi, D. Kufe, J. Rosenblatt, D. Avigan, MUC1-mediated induction of myeloid-derived suppressor cells in patients with acute myeloid leukemia. *Blood* **129**, 1791–1801 (2017).
44. S. Trabanelli, M. F. Chevalier, A. Martinez-Usatorre, A. Gomez-Cadena, B. Salomé, M. Lecciso, V. Salvestrini, G. Verdeil, J. Racle, C. Papayannidis, H. Morita, I. Pizzitola, C. Grandclément, P. Bohner, E. Bruni, M. Girotra, R. Pallavi, P. Falvo, E. O. Leibundgut, G. M. Baerlocher, C. Carlo-Stella, D. Taurino, A. Santoro, O. Spinelli, A. Rambaldi, E. Giarin, G. Basso, C. Tresoldi, F. Ciceri, D. Gfeller, C. A. Akdis, L. Mazzarella, S. Minucci, P. G. Pelicci, E. Marcenaro, A. N. J. McKenzie, D. Vanhecke, G. Coukos, D. Mavilio, A. Curti, L. Derré, C. Jandus, Tumour-derived PGD2 and NKp30-B7H6 engagement drives an immunosuppressive ILC2-MDSC axis. *Nat. Commun.* **8**, 593 (2017).
45. S.-H. Yu, K.-Y. Zhu, J. Chen, X.-Z. Liu, P.-F. Xu, W. Zhang, L. Yan, H.-Z. Guo, J. Zhu, JMJD3 facilitates C/EBP $\beta$ -centered transcriptional program to exert oncorepressor activity in AML. *Nat. Commun.* **9**, 3369 (2018).
46. F. O. Bagger, N. Rapin, K. Theilgaard-Mönch, B. Kaczkowski, J. Jendholm, O. Winther, B. Porse, HemaExplorer: A Web server for easy and fast visualization of gene expression in normal and malignant hematopoiesis. *Blood* **119**, 6394–6395 (2012).
47. F. O. Bagger, N. Rapin, K. Theilgaard-Mönch, B. Kaczkowski, L. A. Thoren, J. Jendholm, O. Winther, B. T. Porse, HemaExplorer: A database of mRNA expression profiles in normal and malignant haematopoiesis. *Nucleic Acids Res.* **41**, D1034–D1039 (2013).
48. S. Heinz, C. E. Romanoski, C. Benner, K. A. Allison, M. U. Kaikkonen, L. D. Orozco, C. K. Glass, Effect of natural genetic variation on enhancer selection and function. *Nature* **503**, 487–492 (2013).



49. N. T. Hogan, M. B. Whalen, L. K. Stolze, N. K. Hadeli, M. T. Lam, J. R. Springstead, C. K. Glass, C. E. Romanoski, Transcriptional networks specifying homeostatic and inflammatory programs of gene expression in human aortic endothelial cells. *eLife* **6**, e22536 (2017).
50. S. Mei, Q. Qin, Q. Wu, H. Sun, R. Zheng, C. Zang, M. Zhu, J. Wu, X. Shi, L. Taing, T. Liu, M. Brown, C. A. Meyer, X. S. Liu, Cistrome Data Browser: A data portal for ChIP-Seq and chromatin accessibility data in human and mouse. *Nucleic Acids Res.* **45**, D658–D662 (2017).
